# Supplementary material
Source: PubMed Central journal article supplement (PMC6141772)
Supplement: develop-145-163535-s1.pdf [file develop-145-163535-s1.pdf]

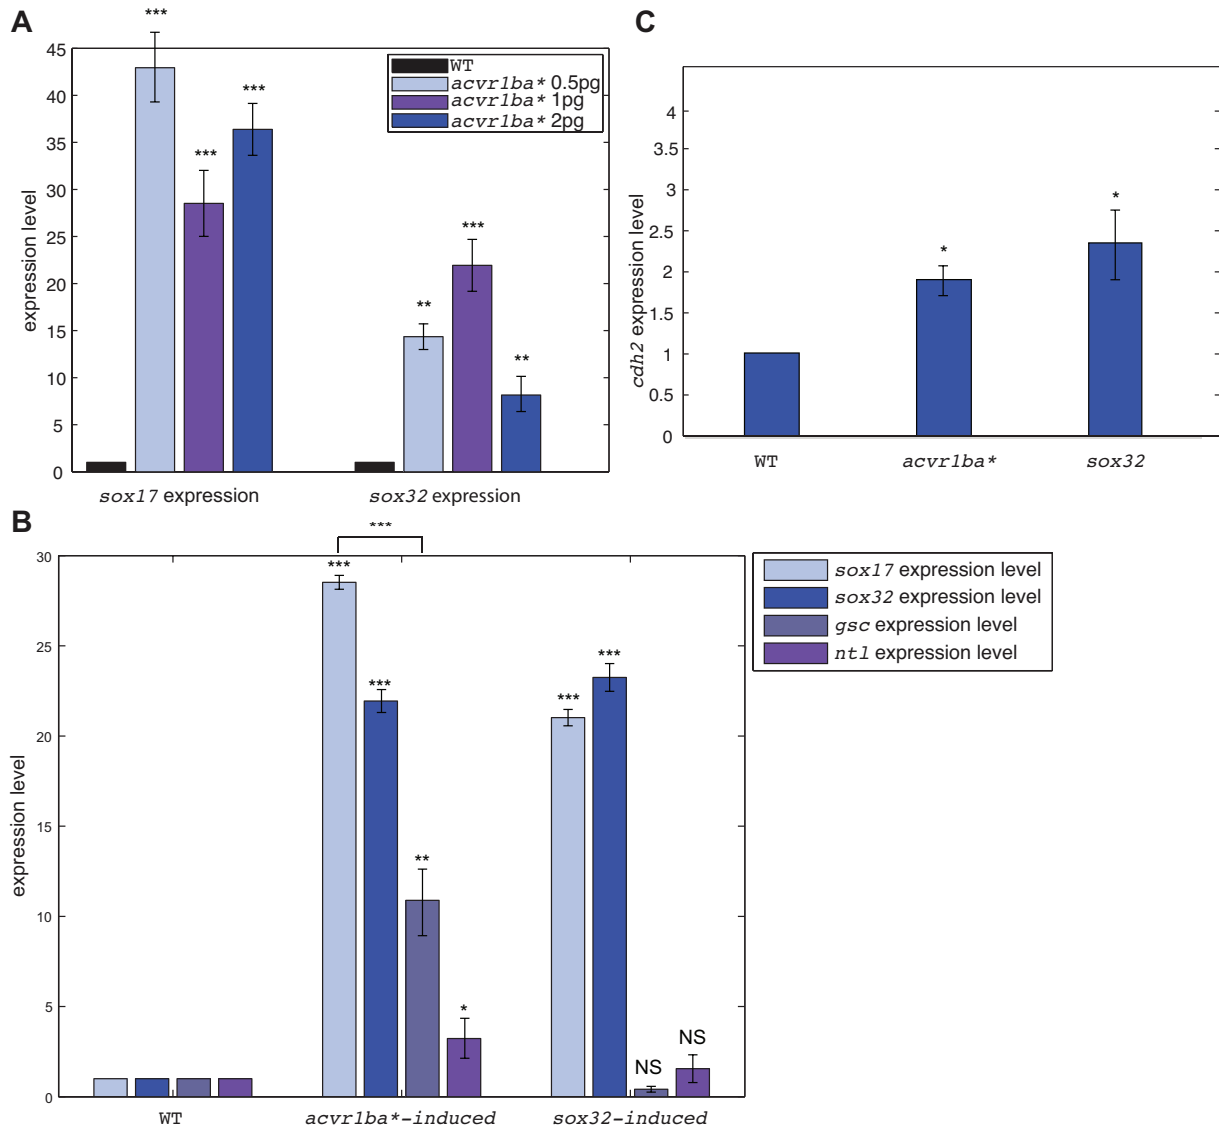

**Figure S1: *acvr1ba\** induces expression of *sox17* and *sox32*. Related to Figure 1.**

**(A)** Expression of *sox17* and *sox32* endodermal markers was measured by real-time quantitative PCR. Constitutive activation of the Nodal pathway by expression of *acvr1ba\** upregulated *sox17* and *sox32* expression (normalized to uninjected controls). \*\* $p < 0.01$ , \*\*\* $p < 0.001$ .

**(B)** Expression of *sox17*, *sox32*, *gsc* and *ntl* was measured by real-time quantitative PCR in *acvr1ba\**-expressing cells and *sox32*-expressing cells in wildtype background. Both *acvr1ba\** and *sox32* more potently induce endodermal markers (*sox17* and *sox32*) than mesodermal markers (*gsc* and *ntl*). \* $p < 0.05$ , \*\* $p < 0.01$ , \*\*\* $p < 0.001$ , NS, not significant.

**(C)** Expression of *cdh2* at 6hpf was measured by real-time quantitative PCR. Both *acvr1ba\** and *sox32*-induced endodermal cells have elevated expression comparing to wild type uninjected controls. \* $p < 0.05$ .

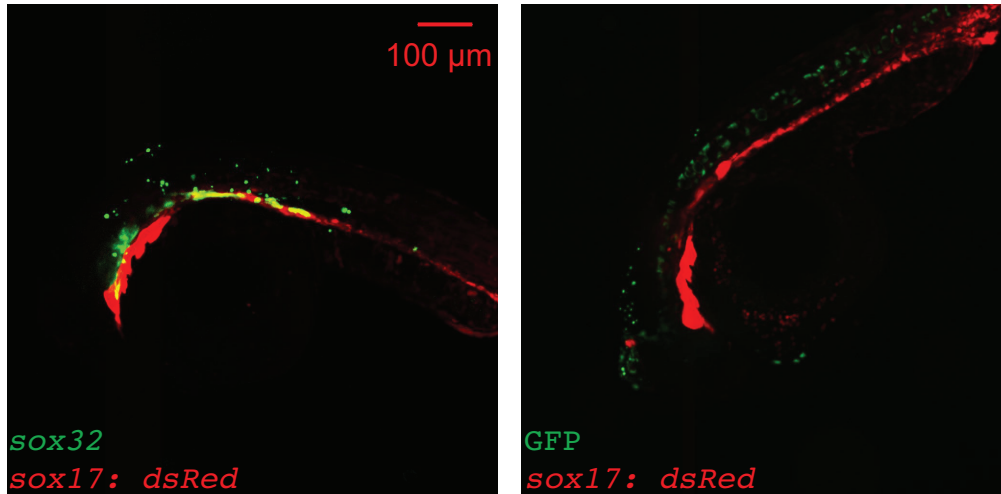

**Figure S2: *sox32*-expressing cells preferentially segregate to endoderm-derived tissues when placed near the dorsal margin. Related to Figure 2.**

Representative images showing distribution of *sox32*-overexpressing cells or GFP-expressing cells that were transplanted to the margin of wild-type host embryos. At 21-somite stage, transplanted *sox32*-overexpressing cells primarily localized to endodermal tissues while GFP-expressing cells localized to mesodermal tissues.

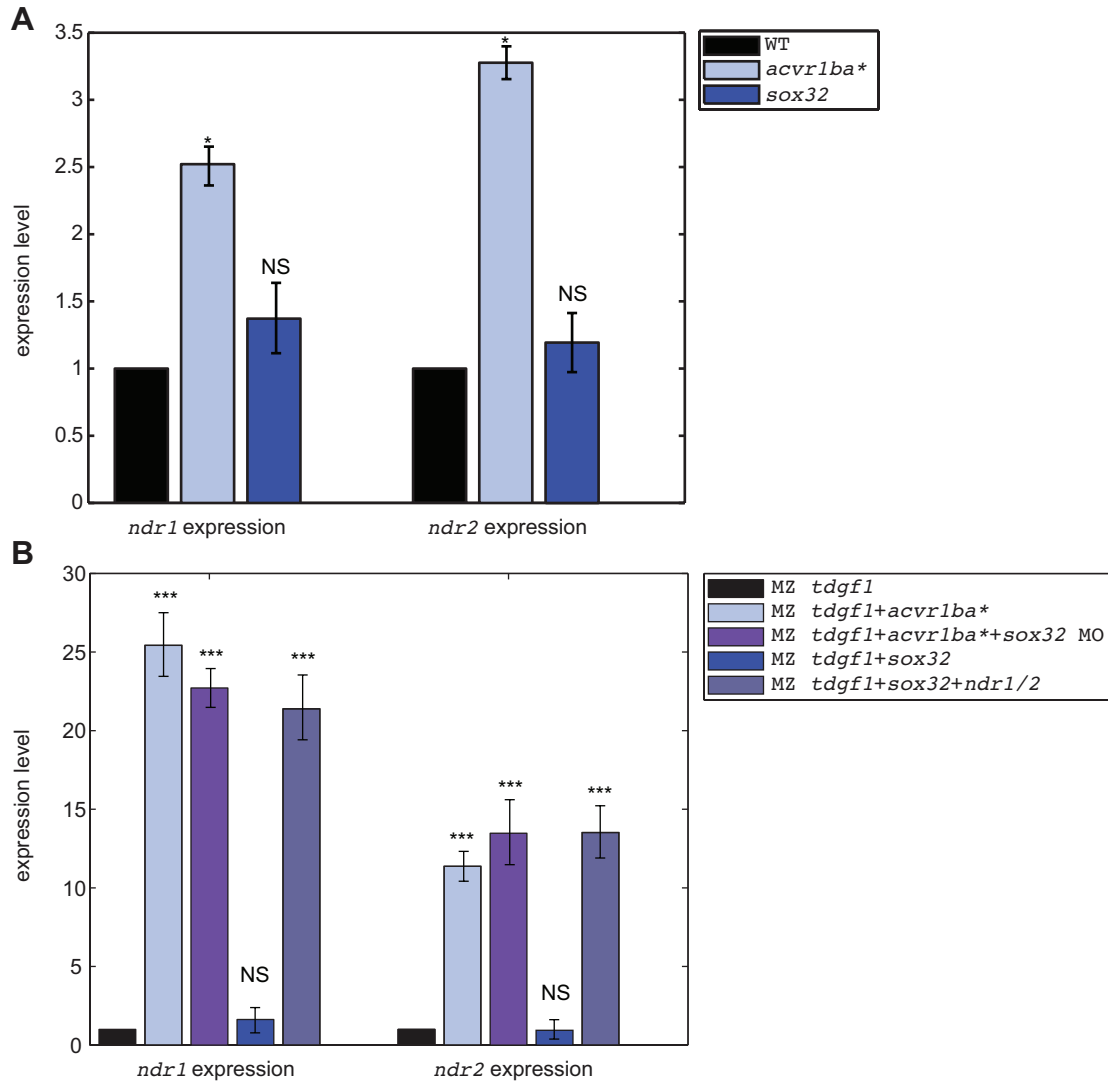

**Figure S3: *ndr1/2* is upregulated by *acvr1ba\**, and *sox32* is neither necessary or sufficient for this upregulation. Related to Figure 2.**

**(A)** *ndr1/2* expression in *acvr1ba\**-expressing cells and *sox32*-overexpressing cells in wildtype background measured by real-time quantitative PCR. \* $p < 0.05$ , NS, not significant.

**(B)** *ndr1/2* expression under all experimental conditions in MZ *tdgf1* background, which removes the confounding effects of maternally deposited Ndr1/2 on driving nodal signaling. \*\*\* $p < 0.001$ , NS, not significant.

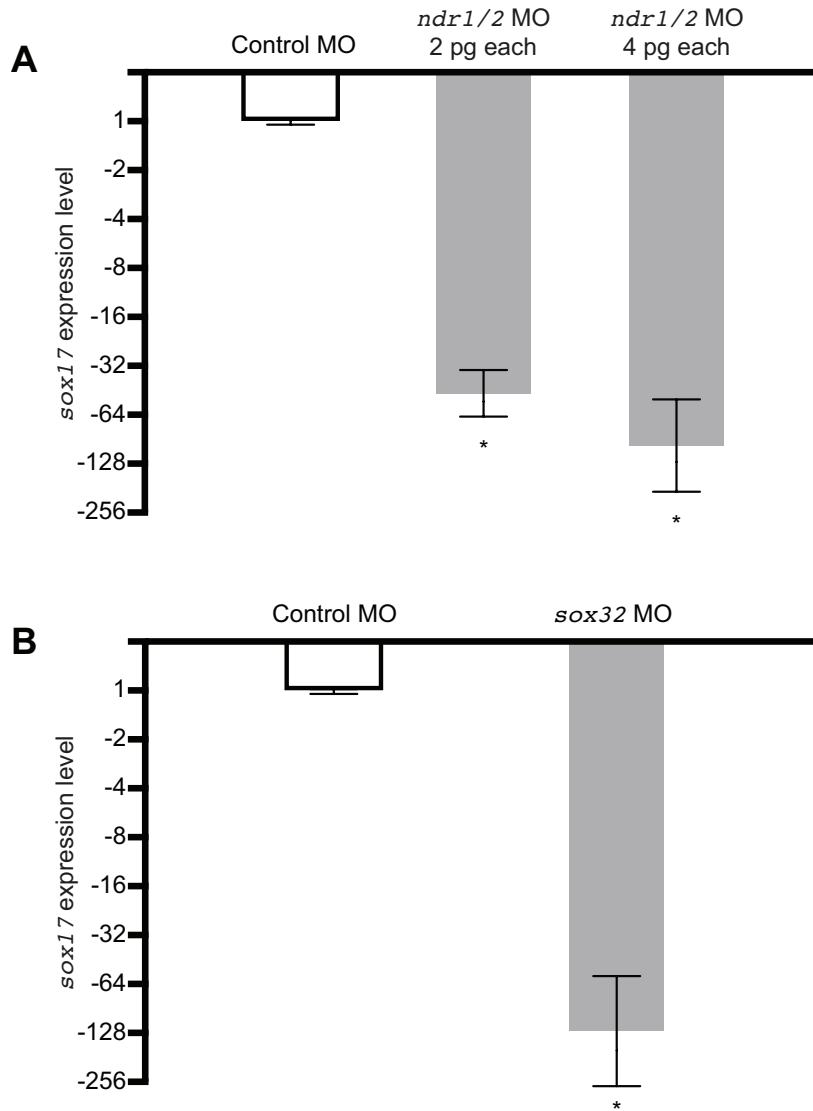

**Figure S4: Validation of *ndr1*, *ndr2* and *sox32* morpholinos. Related to Figure 2.**

**(A)** Validation of *ndr1/2* knockdown. Embryos were injected at the 1-cell stage with standard control (Gene Tools) or *ndr1* and *ndr2* MO. Total RNA was collected at 70% epiboly (7 hpf), and *sox17* expression was quantified by qPCR. *ndr1/2* knockdown reduced *sox17* expression by 50-fold when 2pg each was injected and 80-fold when 4pg each was injected. Data represents averages of 3 biological replicates. Error bars, S.E.M. \*p=0.01.

**(B)** Validation of *sox32* knockdown. Embryos were injected at the 1-cell stage with 2ng of standard control (Gene Tools) or *sox32* MO. Total RNA was collected at 70% epiboly (7 hpf), and *sox17* expression was quantified by qPCR. *sox32* knockdown reduced *sox17* expression by 125-fold. Data represents averages of 3 biological replicates. Error bars, S.E.M. \*p=0.01.

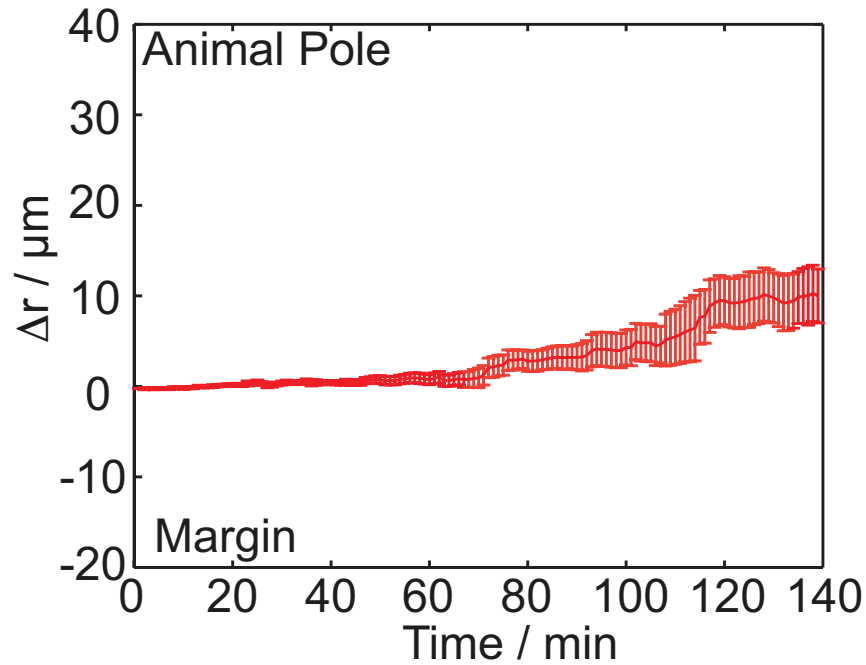

**Figure S5: Single-cell tracking analysis of ingression of *acvr1ba*\*-expressing cells with *sox32* MO. Related to Figure 2.**

Average relative distance with standard error plotted against time. Relative distance was calculated as in Fig. 2I. Unlike cells expressing *acvr1ba*\* only, cells also containing *sox32* MO move toward the surface of the embryo with their ectodermal neighbors.

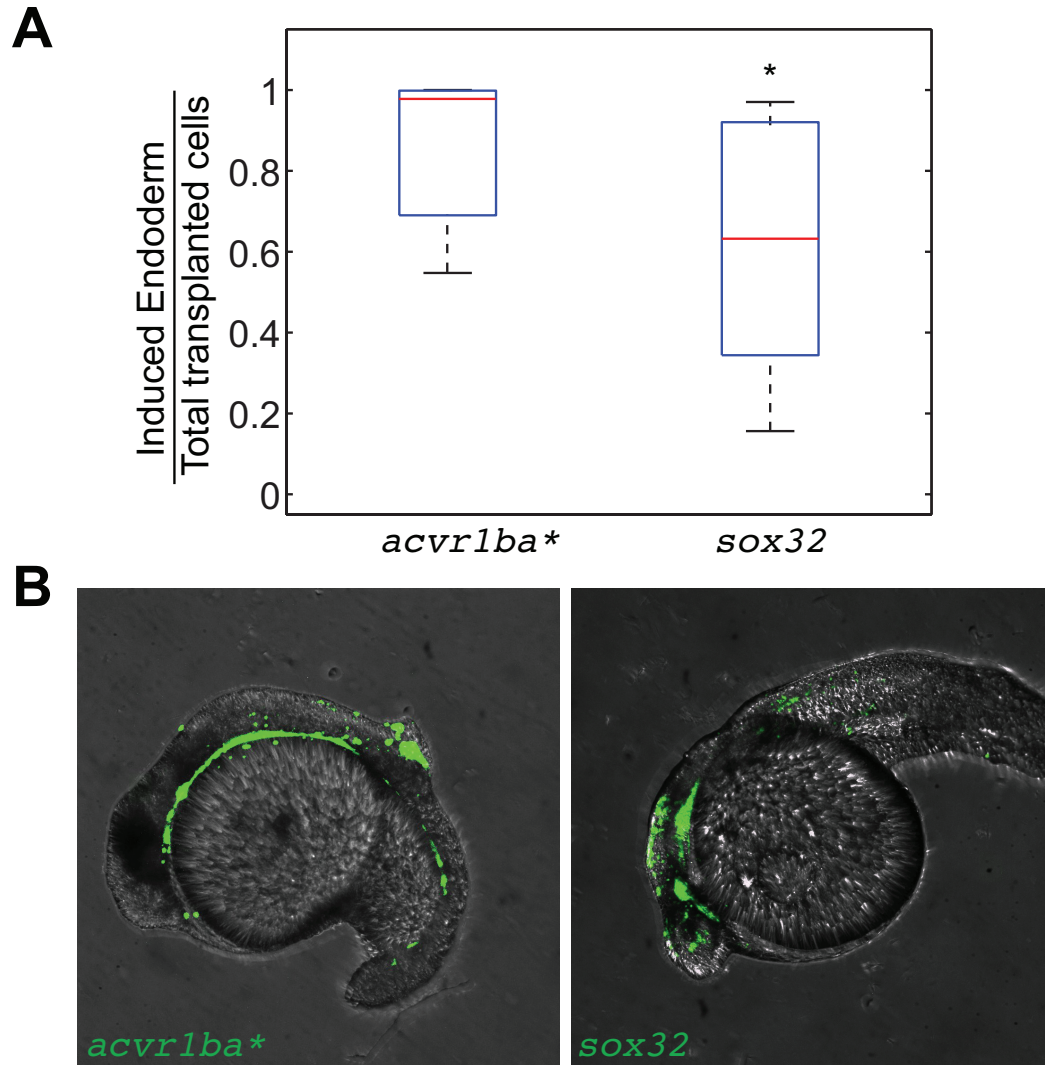

**Figure S6: Induced endodermal cells internalize following transplantation to the margin.**

**(A)** Boxplot quantification of endoderm contribution of transplanted cells at 18 hpf. Data is shown as mean  $\pm$  SEM of independent transplantation experiments with 14 embryos per condition. Student's t-test was performed. \*  $p < 0.05$ .

**(B)** Representative image showing distribution of transplanted cells depicted in (A) at 18 hpf. *acvr1ba\**-expressing cells localized to the endoderm-derived tissue (green). Cells overexpressing *sox32* localize to both endoderm and ectoderm-derived tissue. Lateral view, anterior to the left.

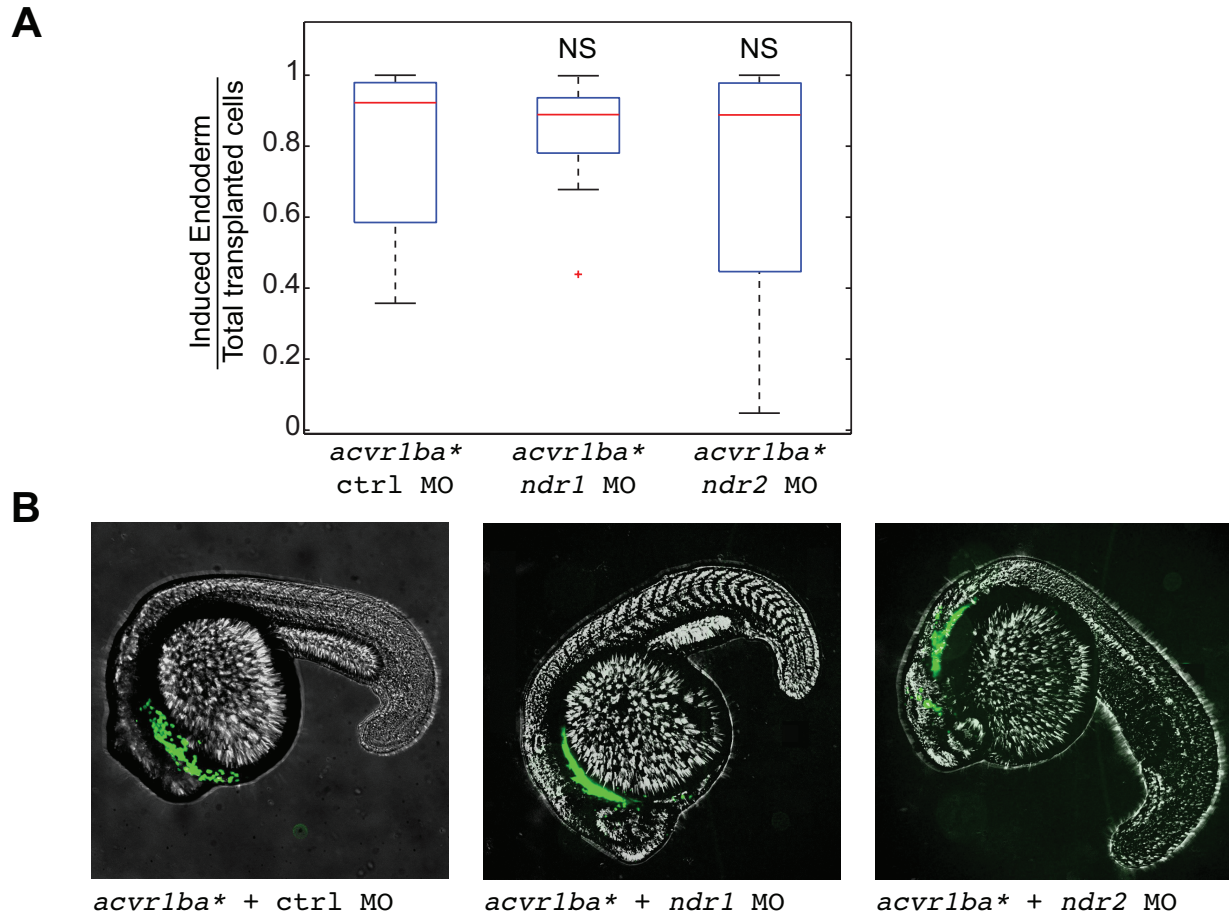

**Figure S7: Ndr1 and Ndr2 act redundantly to support the ability of *acvr1ba\** cells to internalize.**

**(A)** Boxplot quantification of endoderm contribution of transplanted cells at 20 hpf. Data is shown as mean  $\pm$  SEM of independent transplantation experiments with 16 embryos per condition. Student's t-test was performed. NS, not significant.

**(B)** Representative image showing distribution of transplanted cells depicted in (A) at 18 hpf. *acvr1ba\**-expressing cells localized to the endoderm-derived tissue (green) in all three conditions, in contrast to the block of internalization when both Ndr1 and Ndr2 MO are combined in *acvr1ba\** cells (**Fig. 2H**). Lateral view, anterior to the left.

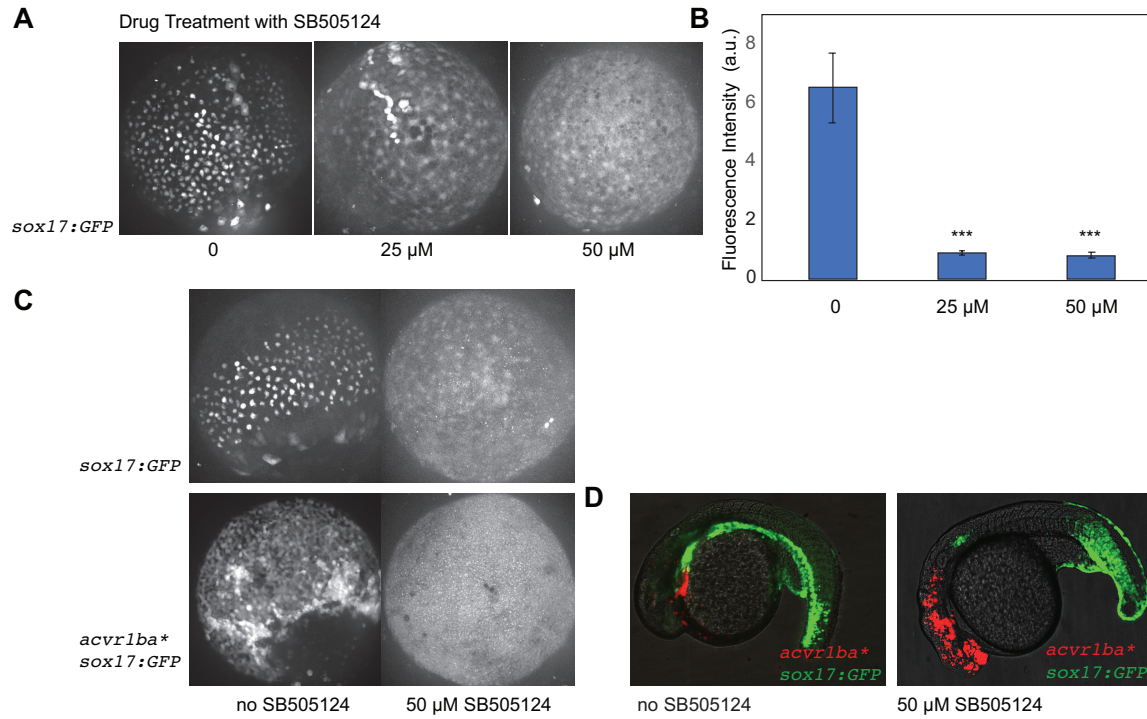

**Figure S8: Nodal signaling inhibitor SB505124 blocks *acvr1ba*\*-expressing cells from sorting.**

**(A)** Representative images of *sox17:GFP* expression under 0, 25  $\mu$ M or 50  $\mu$ M SB505124. Drug treatment began at 6 hpf, images were taken at 10 hpf. Animal pole view.

**(B)** Quantification of *sox17:GFP* fluorescence intensity under 0, 25  $\mu$ M or 50  $\mu$ M SB505124. \*\*\*  $p < 0.001$ .  $n = 3$ .

**(C)** *sox17:GFP* expression for embryos with or without injection of *acvr1ba*\* and under no drug treatment or treated 50  $\mu$ M drug SB505124 treatment.

**(D)** Transplant of *acvr1ba*\*-expressing cells into *sox17:GFP* background under DMSO control and 50  $\mu$ M drug SB505124 treatment at 18hpf.



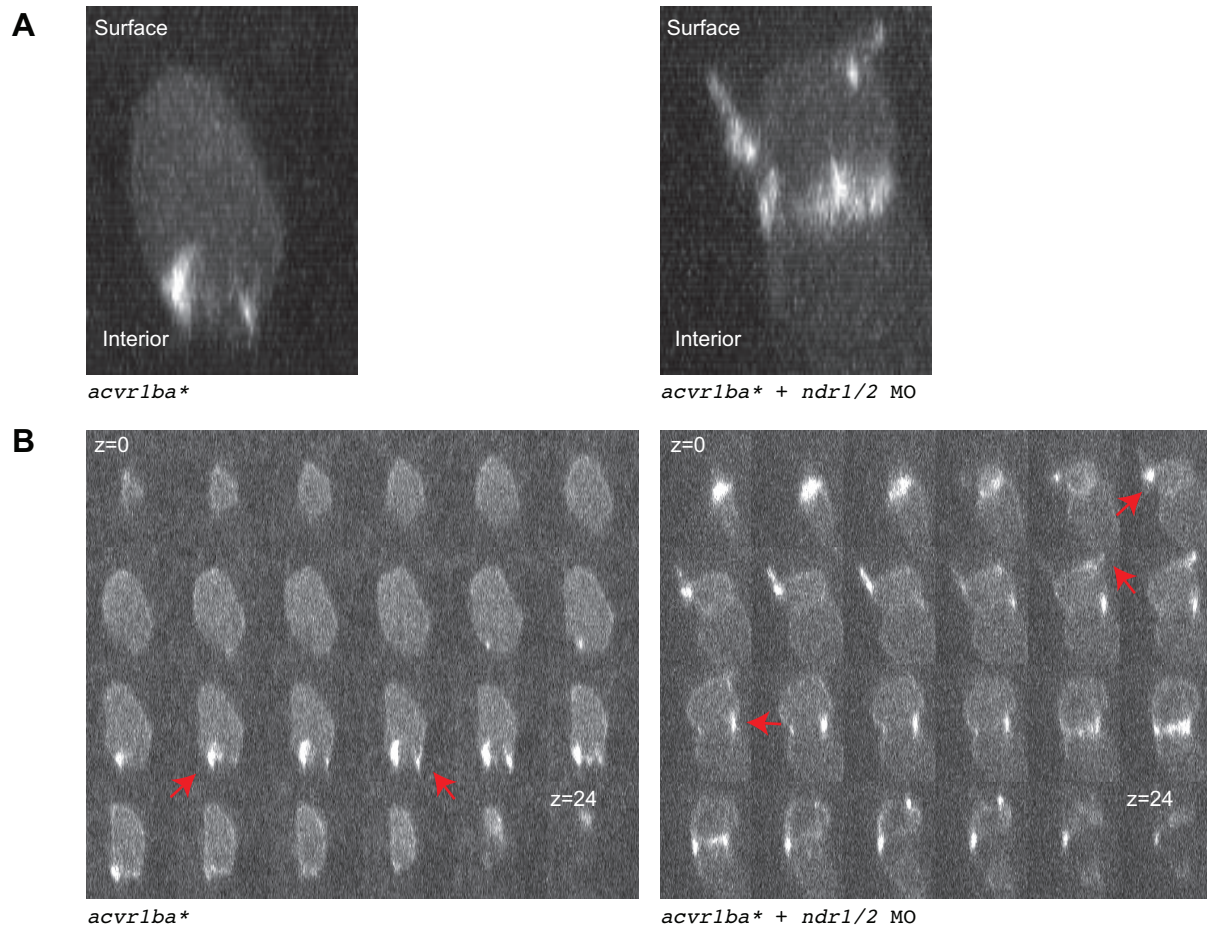

**Figure S9: Blocking autocrine production of *ndr1/2* interferes with polarity of actin-based protrusions in *acvr1ba\** cells. Related to Figure 5.**

**(A)** Maximum Z projection of individual transplanted cells injected with either *acvr1ba\** alone or *acvr1ba\** with *ndr1/2* MOs.

**(B)** Montage of Z stack of cells shown in (A). Red arrows indicate actin enrichment. Numbers indicate  $\mu\text{m}$ .

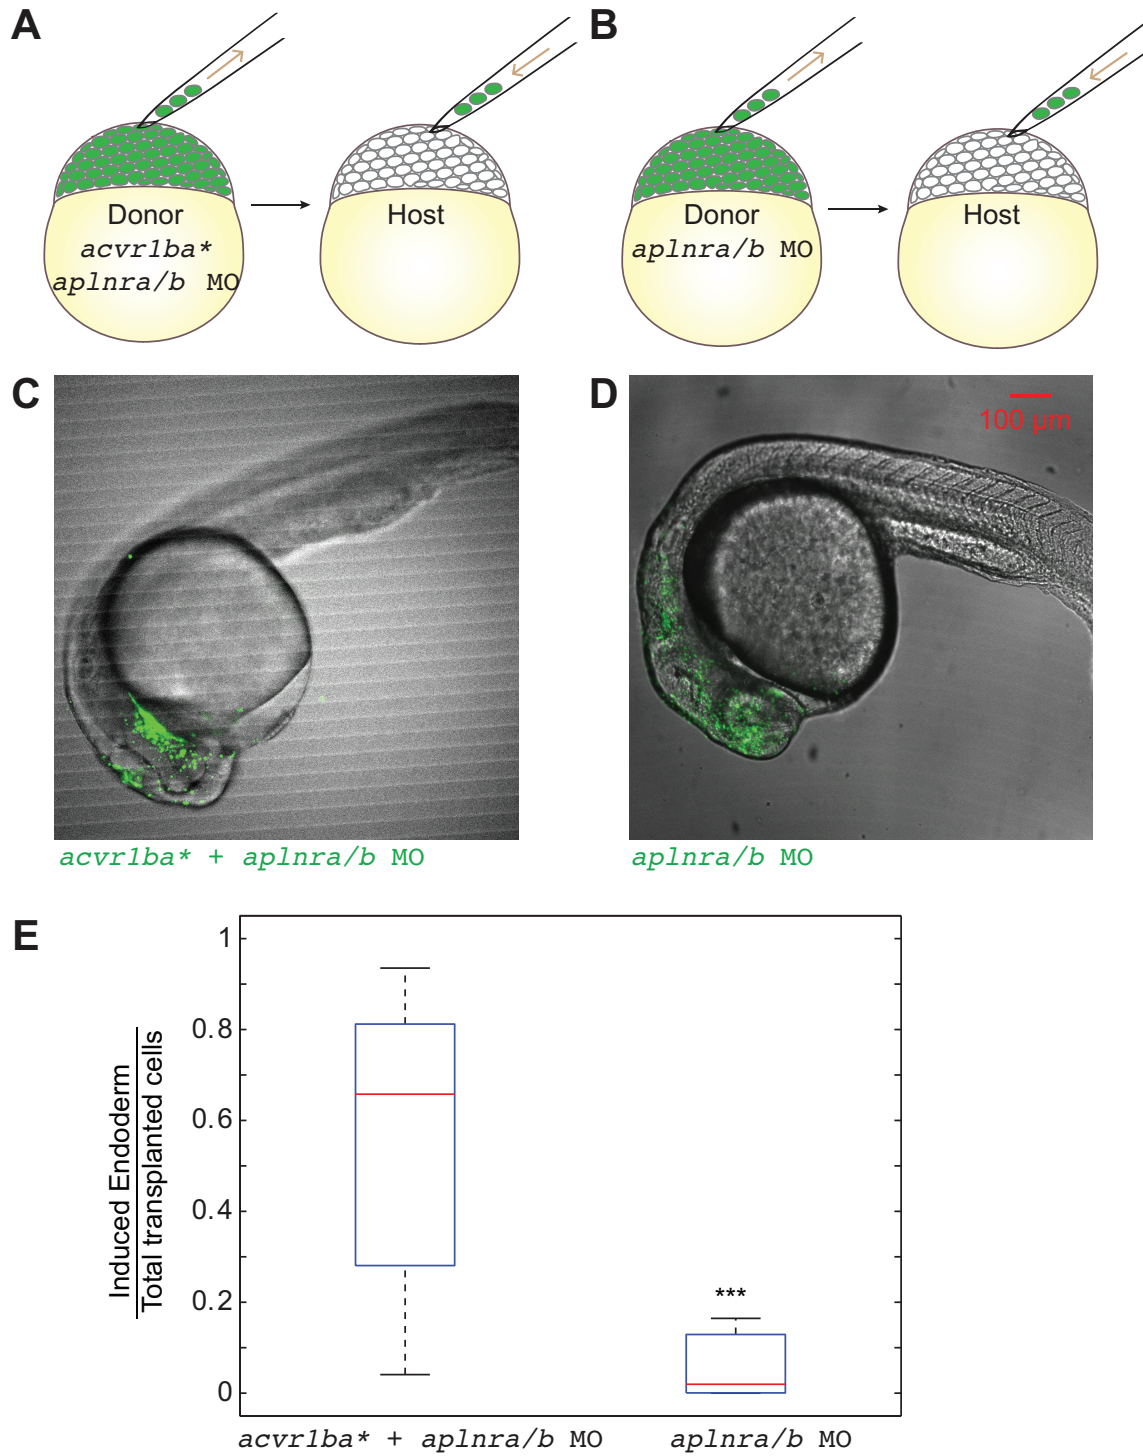

**Figure S10: Apelin receptor signaling is not essential for ectopic endoderm ingression.** (A-B) Schematic diagrams depicting single donor transplant assay to test the role of apelin receptor signaling. (A) *acvr1ba\**-expressing cells with *aplnra* and *aplnrb* MOs were transplanted

to the animal pole of a wild-type host embryo. (B) Cells with *aplnra* and *aplnrb* MOs alone were transplanted to the animal pole of a wild-type host embryo.

**(C-D)** Representative images showing distribution of induced endodermal cells in a wild-type host. Donor cells in (A) (green) mainly localized to endoderm-derived tissue (C), while donor cells in (B) mainly localized to ectoderm-derived tissue (D). Lateral view, anterior to the right.

**(E)** Boxplot quantification of endoderm contribution at 21 hpf of transplanted cells depicted in (A-B). *acvr1ba*<sup>\*</sup>-expressing cells with *aplnra* and *aplnrb* MOs contributed to endoderm significantly more than cells with *aplnra* and *aplnrb* MOs alone. Data is shown as mean  $\pm$  SEM of 3 independent transplantation experiments with 18 embryos per condition. Student's t-test was performed. \*\*\*  $p < 0.001$ .

**Table S1. List of Oligonucleotides**

| Oligonucleotide Name | Sequence                         |
|----------------------|----------------------------------|
| ef1a_forward         | 5'-CAAGAAGAGTAGTACCGCTAGCAT-3'   |
| ef1a_reverse         | 5'-CACGGTGACAACATGCTGGAG-3'      |
| sox17_forward        | 5'-CACAAATGCGGAGCTGAGTAA-3'      |
| sox17_reverse        | 5'-GCCTCCTCAACGAATGGAC-3'        |
| sox32_forward        | 5'-CGGACCTGGAGAACACTGAC-3'       |
| sox32_reverse        | 5'-GCATGTACGGACGCTTATCTG-3'      |
| cdh2_forward         | 5'-CATCCCGGAGACATAGGAGA-3'       |
| cdh2_reverse         | 5'-GCCCTCGTAGTCAAACACCA-3'       |
| Oep5                 | 5'-GAGATGGAGATGTTCTAATG-3'       |
| Oep3m                | 5'-GAACAGTTGACTCGTCAC-3'         |
| Oep3w                | 5'-GAACAGTTGACTCGTCAT-3'         |
| Sox32 MO             | 5'-GCATCCGGTCGACATACATGCTGTT-3'  |
| Sqt MO               | 5'-ATGTCAAATCAAGGTAATAATCCAC-3'  |
| Cyc MO               | 5'-GCGACTCCCGAGCGTGTGCATGATG-3'  |
| Aplnr a MO           | 5'-CGGTGTATTCCGGCGTTGGCTCCAT-3'  |
| Aplnr b MO           | 5'-CAGAGAAGTTGTTTGTGCATGTGCTC-3' |
| Control MO           | 5'-CCTCTTAACCTCAGTTACAATTTATA-3' |

**Table S2. Key Resource Table**

| Reagent or Resource                           | Source     | Identifier |
|-----------------------------------------------|------------|------------|
| Chemicals, Peptides, and Recombinant Proteins |            |            |
| Dextran, Alexa Fluor™ 647                     | Invitrogen | Cat#D22914 |

|                                                         |                     |                         |
|---------------------------------------------------------|---------------------|-------------------------|
| Dextran, Tetramethylrhodamine                           | Invitrogen          | Cat#D1868               |
| Dextran, Fluorescein                                    | Invitrogen          | Cat#D1821               |
| Dextran, Alexa Fluor™ 680                               | Invitrogen          | Cat#D34680              |
| Histone H1 From Calf Thymus, Alexa Fluor™ 488 Conjugate | Invitrogen          | Cat#H13188              |
| Critical Commercial Assays                              |                     |                         |
| mMESSAGE mMACHINE SP6 Transcription Kit                 | Ambion              | Cat#AM1340              |
| SuperScript VILO cDNA Synthesis Kit                     | Invitrogen          | Cat#11754050            |
| SYBR green PCR master mix                               | Applied Biosciences | Cat#4309155             |
| Experimental Models: Organisms/Strains                  |                     |                         |
| Zebrafish: AB/TL                                        | This study          | ZFIN: ZDB-GENO-960809-7 |
| Zebrafish: EKW                                          | This study          | ZFIN: ZDB-GENO-031202-1 |
| Zebrafish: Tg(sox17:GFP)                                | This study          | ZFIN: ZDB-GENO-061228-1 |
| Zebrafish: Tg(sox17:DsRed)                              | This study          | ZFIN: ZDB-GENO-080812-1 |
| Zebrafish: Tg(h2afva:h2afva-mCherry)                    | This study          | ZFIN: ZDB-GENO-100923-1 |
| Zebrafish: Tg(ubb:GFP-Smad2)                            | This study          | N/A                     |

|                                              |                             |                           |
|----------------------------------------------|-----------------------------|---------------------------|
| Zebrafish: <i>tdgf1</i> <sup>tz57/+</sup>    | Lilianna Solnica-Krezel lab | ZFIN: ZDB-GENO-080708-1   |
| Zebrafish: <i>tdgf1</i> <sup>tz57/tz57</sup> | This study                  | ZFIN: ZDB-GENO-980202-989 |
| Oligonucleotides                             |                             |                           |
| List of oligonucleotides                     | See Table S1                | N/A                       |
| Recombinant DNA                              |                             |                           |
| pCS2-acbr1ba*                                | This study                  | N/A                       |
| pCS2-acbr1ba*-p2a-tBFP                       | This study                  | N/A                       |
| pCS2-sox32                                   | This study                  | N/A                       |
| pCS2-sox32-p2a-tBFP                          | This study                  | N/A                       |
| pCS2-ndr1                                    | This study                  | N/A                       |
| pCS2-ndr1-GFP                                | This study                  | N/A                       |
| pCS2-ndr2                                    | This study                  | N/A                       |
| pCS2-ndr2-tBFP                               | This study                  | N/A                       |
| pCS2-GFP-UTRN                                | This study                  | N/A                       |
| pCS2-GFP                                     | This study                  | N/A                       |
| pCS2-h2a-mCherry                             | This study                  | N/A                       |
| pCS2-tdgf1                                   | This study                  | N/A                       |
| pmTol2-ef1a:Venus-Smad2                      | Steve Harvey                | N/A                       |
| Software and Algorithms                      |                             |                           |

|             |                       |                                                                                                                                                                                                                                                       |
|-------------|-----------------------|-------------------------------------------------------------------------------------------------------------------------------------------------------------------------------------------------------------------------------------------------------|
| Fiji        | NIH                   | <a href="https://fiji.sc">https://fiji.sc</a>                                                                                                                                                                                                         |
| Matlab2013a | MathWorks<br>Inc.     | <a href="http://mathworks.com">http://mathworks.com</a>                                                                                                                                                                                               |
| TGMM        | Philipp Keller<br>lab | <a href="https://www.janelia.org/lab/keller-lab/software/fast-accurate-reconstruction-cell-lineages-large-scale-fluorescence">https://www.janelia.org/lab/keller-lab/software/fast-accurate-reconstruction-cell-lineages-large-scale-fluorescence</a> |

### Contact for Reagent and Resource Sharing

Further information and requests for resources and reagents should be directed to Orion Weiner (orion.weiner@ucsf.edu).

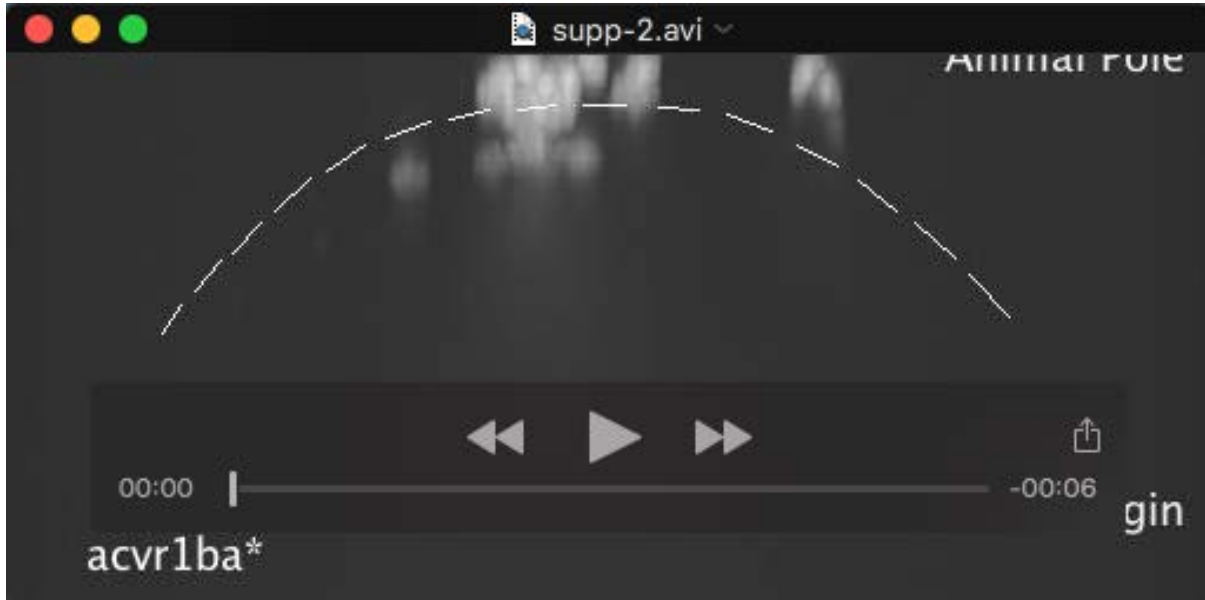

**Movie S1:** *acvr1ba*\*-induced endodermal cells ingress into the inner layer when transplanted to the animal pole. Related to Figure 1. Frames were acquired every 5 min for 195 min. Playback is 7 frames/s.

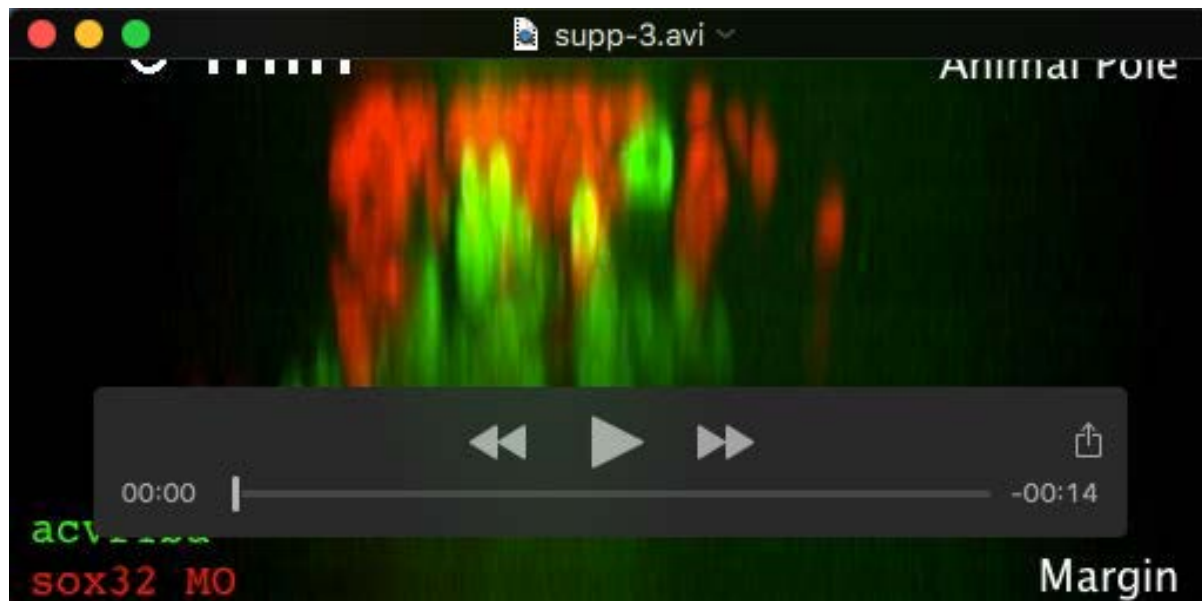

**Movie S2:** *acvr1ba*\*-induced endodermal cells and *sox32* MO induced ectodermal cells segregate into two separate layers. *sox32* MO-injected donor cells (red) remain on the outer layer of the embryo, while *acvr1ba*\*-injected donor cells (green) migrate into the inner layer of the embryo. Related to Figure 1. Frames were acquired every 3 min for 288 min. Playback is 7 frames/s.
